# Supplementary material for: Nano-Formulation of Ethambutol with Multifunctional Graphene Oxide and Magnetic Nanoparticles Retains Its Anti-Tubercular Activity with Prospects of Improving Chemotherapeutic Efficacy
Source: MDPI journal article supplement (doi:10.3390/molecules22101697), 2017-10-12
Supplement: s1 [file s1]

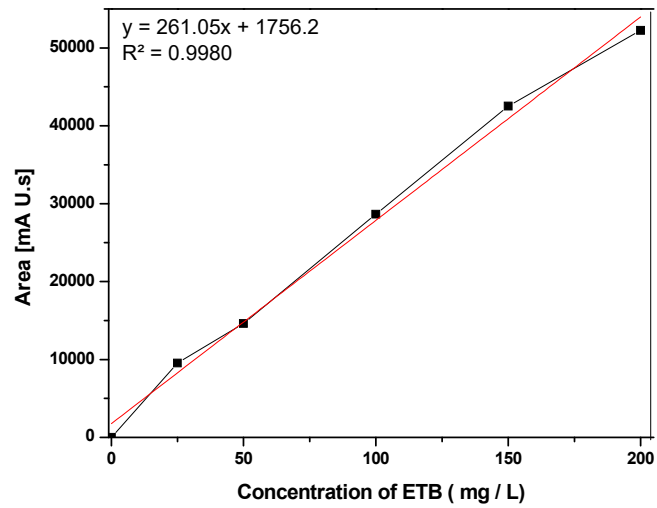

**Figure S1.** Calibration curve of ETB determined by using HPLC with different standard concentrations of 0 mg/L, 25 mg/L, 50 mg/L, 100mg/L, 150 mg/L, and 200 mg/L.

**Notes:** The red line shows linear fitting of calibration curve and the black line shows the experimental data.
